# Supplementary material
Source: publisher figshare collection journal article supplement (https://tandf.figshare.com/articles/dataset/_/7034792)
Supplement: Supplementary file 1 [file 3]

Archive with 2 entries (2 files):
- Supplemental_Figure_legends.pdf
- Supplemental_Figures.pdf
