# Supplementary material
Source: publisher figshare collection journal article supplement (https://tandf.figshare.com/articles/dataset/_/7034792)
Supplement: Supplementary file 1 [file 3 › Supplemental_Figure_legends.pdf]

## Supplemental Figure Legends

**Figure S1.** CASP4/caspase-11 plays a role in cleavage of CASP1, IL1B, and CASP7 during *B. cenocepacia* infection. **(A)** Intracellular CFUs of *B. cenocepacia* (B.c.) MH1K in WT and *casp4*<sup>-/-</sup> macrophages at 6 h post infection. Values are fold changes relative to CFUs at 30 min post infection. Shown are mean  $\pm$ SEM of 9 independent experiments (n=9). Statistical analysis was performed using paired t-test. **(B)** Immunoblot analysis of CASP4 in WT macrophages at 2 h post infection. **(C)** Densitometry analysis of CASP4 expression in WT macrophages at 2 h post infection. Shown are mean  $\pm$ SEM of 4 independent experiments (n=4). Statistical analysis was performed using paired t-test. **(D)** Full immunoblot of pro-CASP1, cleaved CASP1 p20 and GAPDH (shown in Fig. 1F) from WT and *casp4*<sup>-/-</sup> macrophages infected with *B. cenocepacia* MH1K at 6 h post infection. **(E)** Immunoblot of pro-IL1B and cleaved IL1B p17 from WT, *casp4*<sup>-/-</sup>, and *casp1*<sup>-/-</sup> macrophages infected with *B. cenocepacia* MH1K at 6 h post infection. Representative image of 3 independent experiments (n=3). **(F)** Immunoblot analysis of cleaved CASP7 in WT and *casp4*<sup>-/-</sup> macrophages infected with *B. cenocepacia* MH1K at 6 h post infection. **(G)** Densitometry analysis of *B. c.*-induced cleavage of CASP7. Shown are mean  $\pm$ SEM of 5 independent experiments (n=5). Statistical analysis was performed using two-way ANOVA. \*p $\leq$ 0.05, \*\*\*p $\leq$ 0.001. NT, no treatment.

**Figure S2.** CASP4/caspase-11 and MEFV/PYRIN contribute to *B. cenocepacia*-mediated activation of CASP1. **(A)** Immunoblot of CASP4 in wild-type (WT), *mefv*<sup>-/-</sup>/*pyrin*<sup>-/-</sup>, and *casp4*<sup>-/-</sup> macrophages infected with *B. cenocepacia* (B.c.) MH1K at 6 h post infection. Representative image of 3 independent experiments (n=3). **(B)** Immunoblot of CASP1 in WT, *mefv*<sup>-/-</sup>, and *casp4*<sup>-/-</sup> macrophages infected with *B. cenocepacia* MH1K at 6 h post infection. Representative image of 3 independent experiments (n=3). NT, no treatment.

**Figure S3.** Histological scores and pulmonary CFUs of *B. cenocepacia*-infected mice. **(A)** Alveolitis and fibrin exudation scores of *B. cenocepacia* (B.c.)-infected WT and *casp4*<sup>-/-</sup> mice (30x10<sup>6</sup> CFU). **(B)** Recovered *B. cenocepacia* CFU at day 8 from lungs of surviving *casp4*<sup>-/-</sup> mice depicted in Fig 2C. Pooled data from 2 independent experiments are shown as mean  $\pm$  SEM (n=6 surviving mice).

**Figure S4.** Intracellular survival and LC3-II conversion of *B. cenocepacia*  $\Delta$ T6SS mutant and nonpathogenic *E. coli*. **(A)** Intracellular survival of *Escherichia* (*E.*) *coli* in wild-type (WT) and *casp4*<sup>-/-</sup> macrophages. Data are presented as mean  $\pm$  SEM from 3 independent experiments (n=3). Statistical analysis was performed using two-way ANOVA. **(B)** Invasion of *B. cenocepacia* (B.c.) WT and  $\Delta$ T6SS in WT macrophages. Data are presented as mean  $\pm$  SEM from 3 independent experiments (n=3). Statistical

analysis was performed using Student's t-test. **(C)** Intracellular survival of *B. c.* WT and  $\Delta$ T6SS in WT macrophages. Data are presented as mean  $\pm$  SEM from 3 independent experiments (n=3). Statistical analysis was performed using two-way ANOVA. **(D)** Representative immunoblots of WT and *casp4*<sup>-/-</sup> macrophages infected with *B.c.* or *E. coli* at 6 h post infection. **(E)** Densitometry analysis of immunoblots shown in (D). Data are mean  $\pm$ SEM of 3 independent experiments (n=3). Statistical analysis was performed using two-way ANOVA. **(F)** Representative immunoblots of WT and *casp4*<sup>-/-</sup> macrophages infected with *B. cenocepacia* WT or T6SS mutant at 6 h post infection. **(G)** Densitometry analysis of immunoblots shown in (F). Shown are mean  $\pm$ SEM of 3 independent experiments (n=3). Statistical analysis was performed using two-way ANOVA. \*p $\leq$ 0.05, \*\*p $\leq$ 0.01, \*\*\*p $\leq$ 0.001. NT, no treatment.
