# Supplementary material
Source: publisher figshare collection journal article supplement (https://tandf.figshare.com/articles/dataset/_/7034792)

## Supplemental Figures

**Figure S1. Caspase-11 (CASP4) plays a role cleavage of Caspase-1 (CASP1), IL-1B, and Caspase-7 (CASP7) during *B. cenocepacia* (*B.c.*) infection. Related to Figure 1**

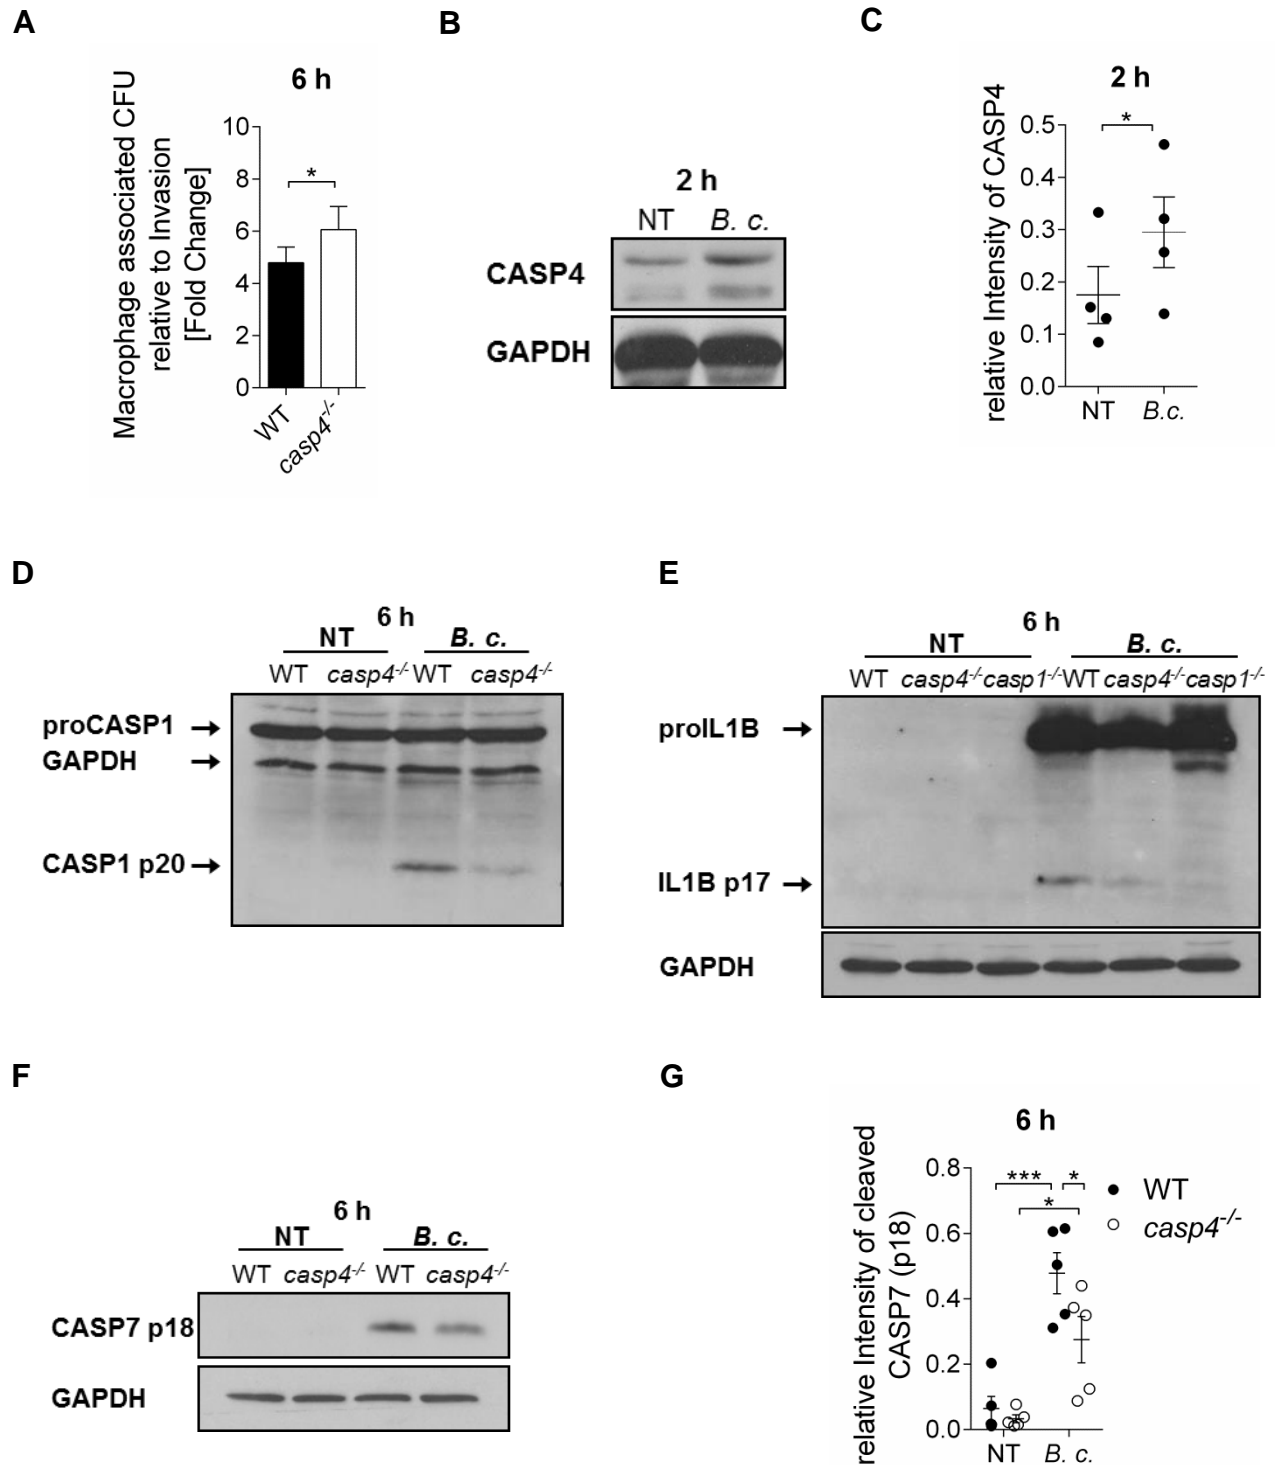

**Figure S2. Caspase-11 (CASP4) and PYRIN contribute to *B. cenocepacia*-mediated activation of Caspase-1 (CASP1). Related to Figure 1**

**A**

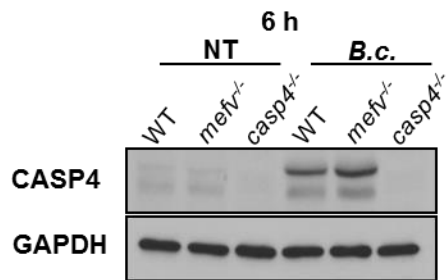

**B**

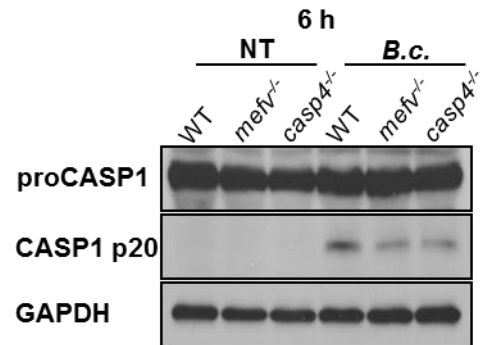

**Figure S3. Histological Scores and pulmonary CFUs of *B. cenocepacia*-infected mice. Related to Figure 2**

**A**

|        | Alveolitis            |                             | Fibrin                |                             |
|--------|-----------------------|-----------------------------|-----------------------|-----------------------------|
| Animal | WT                    | <i>casp4</i> <sup>-/-</sup> | WT                    | <i>casp4</i> <sup>-/-</sup> |
| 1      | 4                     | 3                           | 1                     | 0                           |
| 2      | 3                     | 3                           | 1                     | 0                           |
| 3      | 5                     | 3                           | 1                     | 0                           |
| 4      | 4                     | 4                           | 1                     | 0                           |
| Median | <b>4</b> <sup>1</sup> | <b>3</b> <sup>1</sup>       | <b>1</b> <sup>2</sup> | <b>0</b> <sup>2</sup>       |

Score definition

<sup>1</sup>Alveolitis: 0, absent; 1, minimal; 2, slight; 3, moderate; 4, marked; 5, severe

<sup>2</sup>Fibrin: 0, absent; 1, present; 2, significant

**B**

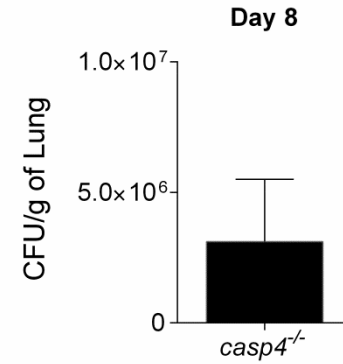

**Figure S4. Intracellular survival and LC3-II conversion of *B. cenocepacia*  $\Delta$ T6SS mutant and non-pathogenic *E. coli*. Related to Figure 3.**

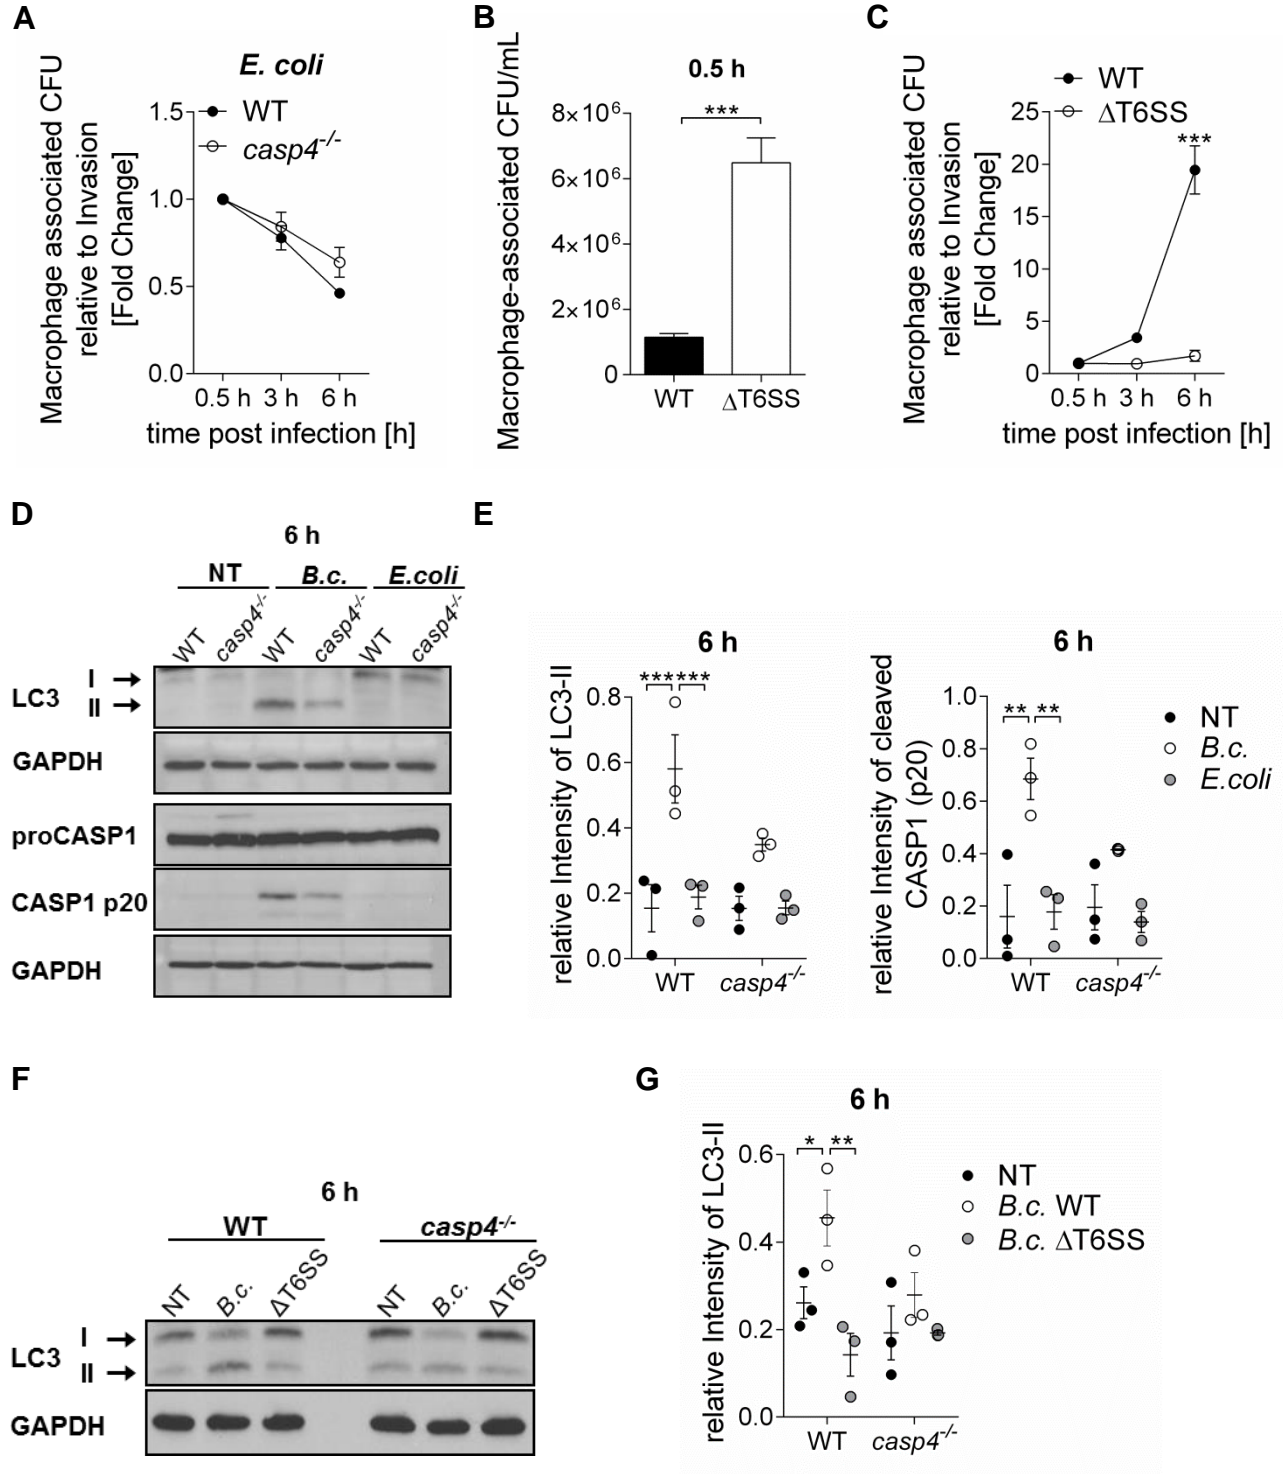

Supplement: Supplementary file 1 [file 3 › Supplemental_Figures.pdf]
